# Supplementary material for: The epidemiology and risk factors of chronic polyneuropathy
Source: Springer Nature journal article supplement (doi:10.1007/s10654-015-0094-6), 2015-12-23
Supplement: MOESM1 [file 8885672]

## **The epidemiology and risk factors of chronic polyneuropathy**

R. Hanewinkel MD<sup>1,2</sup>, M. van Oijen MD PhD<sup>1,2,3</sup>, M.A. Ikram MD PhD<sup>1</sup>, P.A. van Doorn MD PhD<sup>2</sup>.

<sup>1</sup>Department of Epidemiology, Erasmus University Medical Center, Rotterdam, The Netherlands

<sup>2</sup>Department of Neurology, Erasmus University Medical Center, Rotterdam, The Netherlands

<sup>3</sup>Department of Neurology, Alrijne Ziekenhuis, Leiderdorp, The Netherlands

Corresponding author: M.A. Ikram, MD PhD

Department of Epidemiology, Erasmus University Medical Center

P.O. box 2040, 3000 CA, Rotterdam, The Netherlands

Tel: +31 10 7043489 / Fax: +31 10 7044657 / E-mail: [m.a.ikram@erasmusmc.nl](mailto:m.a.ikram@erasmusmc.nl)

**Supplementary data**

## Search terms for different databases. Date last search 08-01-2015

### Embase.com 2007

(polyneuropathy/exp OR neuropathy/de OR 'demyelinating neuropathy'/exp OR 'peripheral neuropathy'/de OR 'diabetic neuropathy'/de OR 'sensorimotor neuropathy'/exp OR 'motor neuropathy'/exp OR 'nerve conduction disorder'/de OR 'sensory neuropathy'/exp OR (polyneuropath\* OR polyradiculoneuropath\* OR polyradioneurit\* OR ((poly OR multiple OR peripheral OR amyloid OR 'giant axonal' OR uremic OR alcohol OR diabet\* OR demyelinat\* OR idiopath\* OR cryptogen\* OR sensorimotor\* OR motor\* OR sensor\* OR 'distal symmetric') NEAR/3 (neuropath\* OR polyneurit\* OR neurit\*)) OR ('nerve conduction' NEAR/3 (disorder\* OR defect\* OR deficit\* OR disturb\*)) OR ((neuropathy OR neuropathies) NOT ((optic\* OR auditor\*) NEAR/3 neuropath\*)):ab,ti) AND (incidence/exp OR prevalence/de OR 'epidemiological data'/de OR (incidenc\* OR prevalen\* OR (epidemiolog\* NEAR/3 (data OR monitor\* OR assess\*)):ab,ti) AND ('community assessment'/de OR 'community sample'/de OR community/de OR population/de OR 'urban population'/de OR 'rural population'/de OR 'population research'/de OR 'population based case control study'/de OR (population\* OR communit\* ):ab,ti) AND [english]/lim NOT ([Conference Abstract]/lim OR [Letter]/lim OR [Note]/lim OR [Conference Paper]/lim OR [Editorial]/lim)

### Medline (ovidSP) 1376

(exp polyneuropathies/ OR Diabetic Neuropathies/ OR (polyneuropath\* OR polyradiculoneuropath\* OR polyradioneurit\* OR ((poly OR multiple OR peripheral OR amyloid OR giant axonal OR uremic OR alcohol OR diabet\* OR demyelinat\* OR idiopath\* OR cryptogen\* OR sensorimotor\* OR motor\* OR sensor\* OR distal symmetric) ADJ3 (neuropath\* OR polyneurit\* OR neurit\*)) OR (nerve conduction ADJ3 (disorder\* OR defect\* OR deficit\* OR disturb\*)) OR ((neuropathy OR neuropathies) NOT ((optic\* OR auditor\*) ADJ3 neuropath\*)):ab,ti.) AND (incidence/ OR prevalence/ OR Epidemiological Monitoring/ OR Epidemiologic Measurements/ OR (incidenc\* OR prevalen\* OR (epidemiolog\* ADJ3 (data OR monitor\* OR assess\*)):ab,ti.) AND (exp population/ OR (population\* OR communit\* ).ab,ti.) AND english.la. NOT (letter OR news OR comment OR editorial OR congresses OR abstracts).pt.

### Cochrane 55

((polyneuropath\* OR polyradiculoneuropath\* OR polyradioneurit\* OR ((poly OR multiple OR peripheral OR amyloid OR 'giant axonal' OR uremic OR alcohol OR diabet\* OR demyelinat\* OR idiopath\* OR cryptogen\* OR sensorimotor\* OR motor\* OR sensor\* OR 'distal symmetric') NEAR/3 (neuropath\* OR polyneurit\* OR neurit\*)) OR ('nerve conduction' NEAR/3 (disorder\* OR defect\* OR deficit\* OR disturb\*)) OR ((neuropathy OR neuropathies) NOT ((optic\* OR auditor\*) NEAR/3 neuropath\*)):ab,ti) AND ((incidenc\* OR prevalen\* OR (epidemiolog\* NEAR/3 (data OR monitor\* OR assess\*)):ab,ti) AND ((population\* OR communit\* ):ab,ti)

### Web-of-science 1445

TS=(((polyneuropath\* OR polyradiculoneuropath\* OR polyradioneurit\* OR ((poly OR multiple OR peripheral OR amyloid OR "giant axonal" OR uremic OR alcohol OR diabet\* OR demyelinat\* OR idiopath\* OR cryptogen\* OR sensorimotor\* OR motor\* OR sensor\* OR "distal symmetric") NEAR/3 (neuropath\* OR polyneurit\* OR neurit\*)) OR ("nerve conduction" NEAR/3 (disorder\* OR defect\* OR deficit\* OR disturb\*)) OR ((neuropathy OR neuropathies) NOT ((optic\* OR auditor\*) NEAR/3 neuropath\*)))) AND ((incidenc\* OR prevalen\* OR (epidemiolog\* NEAR/3 (data OR monitor\* OR assess\*)))) AND ((population\* OR communit\* )) ) AND LA=(english) AND DT=(Article)

### PubMed publisher 36

((polyneuropath\*[tiab] OR polyradiculoneuropath\*[tiab] OR polyradioneurit\*[tiab] OR ((poly[tiab] OR multiple[tiab] OR peripheral[tiab] OR amyloid[tiab] OR giant axonal\*[tiab] OR uremic[tiab] OR

alcohol[tiab] OR diabet\*[tiab] OR demyelinat\*[tiab] OR idiopath\*[tiab] OR cryptogen\*[tiab] OR sensorimotor\*[tiab] OR motor\*[tiab] OR sensor\*[tiab] OR distal symmetric\*[tiab]) AND (neuropath\*[tiab] OR polyneurit\*[tiab] OR neurit\*[tiab])) OR nerve conduction disorder\*[tiab] OR nerve conduction defect\*[tiab] OR nerve conduction deficit\*[tiab] OR nerve conduction disturb\*[tiab] OR ((neuropathy[tiab] OR neuropathies[tiab]) NOT ((optic\*[tiab] OR auditor\*[tiab]) AND neuropath\*[tiab]))) AND ((incidenc\*[tiab] OR prevalen\*[tiab] OR (epidemiolog\*[tiab] AND (data[tiab] OR monitor\*[tiab] OR assess\*[tiab]))) AND ((population\*[tiab] OR communit\*[tiab] )) AND english[la] AND publisher[sb]

**Google Scholar**            **200**

Polyneuropathy|"peripheral|diabetic neuropathy" incidence|prevalence|"epidemiological data|monitoring|assessment" community|population
